# Supplementary material for: Characteristics of Pediatric In-Hospital Cardiac Arrests and Resuscitation Duration
Source: PubMed Central journal article supplement (PMC11289702; doi:10.1001/jamanetworkopen.2024.24670), 2024-07-30
Supplement: jamanetwopen-e2424670-s001.pdf [file jamanetwopen-e2424670-s001.pdf]

## Supplementary Online Content

O'Halloran A, Morgan RW, Kennedy K, et al; American Heart Association's Get With the Guidelines–Resuscitation Investigators. Characteristics of pediatric in-hospital cardiac arrests and resuscitation duration. *JAMA Netw Open*. 2024;7(7):e2424670. doi:10.1001/jamanetworkopen.2024.24670

**eTable 1.** List of Variables Included in the Model

**eTable 2.** Patient-Level Analysis: Characteristics of Events Without Return of Circulation Stratified by Quartile of CPR Duration

**eTable 3.** Patient Characteristics: All Eligible Events by Resuscitation Status

**eFigure 1.** Distribution of CPR Duration in All Events

**eFigure 2.** Distribution of CPR Duration in Events With Return of Circulation

**eTable 4.** Multivariable Model of Patient-Level Analysis: Factors Associated With CPR Duration Among Events Without Return of Circulation

**eFigure 3.** Unabbreviated Forest Plot of Patient-Level Analysis Multivariable Model: Patient and Event Factors Associated With CPR Duration in Events Without Return of Circulation

**eTable 5.** Hospital-Level Analysis: Site Characteristics by Hospital Quartile of Median CPR Duration in Events Without Return of Circulation

This supplementary material has been provided by the authors to give readers additional information about their work.

**eTable 1.** List of Variables Included in the Model

|                                                                                                                                                                                                                                                     |
|-----------------------------------------------------------------------------------------------------------------------------------------------------------------------------------------------------------------------------------------------------|
| <u>Demographics</u>                                                                                                                                                                                                                                 |
| Calendar year                                                                                                                                                                                                                                       |
| Age at the time of cardiac arrest, divided into four groups<br>Neonates ( $\leq 30$ days), infants (31 days to $< 1$ year), young children (1-8 years), and older children ( $> 8$ years of age)                                                    |
| Sex                                                                                                                                                                                                                                                 |
| Race                                                                                                                                                                                                                                                |
| Illness category, categorized as medical cardiac, medical noncardiac, surgical cardiac, surgical noncardiac, trauma, and newborn                                                                                                                    |
| <u>Pre-existing conditions</u>                                                                                                                                                                                                                      |
| Congestive heart failure (this admission)                                                                                                                                                                                                           |
| Congestive heart failure (prior to this admission)                                                                                                                                                                                                  |
| Hypotension/hypoperfusion                                                                                                                                                                                                                           |
| Renal insufficiency                                                                                                                                                                                                                                 |
| Hepatic insufficiency                                                                                                                                                                                                                               |
| Metabolic/electrolyte abnormality                                                                                                                                                                                                                   |
| Pneumonia                                                                                                                                                                                                                                           |
| Major trauma                                                                                                                                                                                                                                        |
| <u>Interventions Already in Place</u>                                                                                                                                                                                                               |
| Mechanical ventilation                                                                                                                                                                                                                              |
| Vasoactive agent                                                                                                                                                                                                                                    |
| <u>Event Characteristics</u>                                                                                                                                                                                                                        |
| Hospital-wide alert                                                                                                                                                                                                                                 |
| Automated external defibrillator applied                                                                                                                                                                                                            |
| Initial rhythm, categorized as ventricular fibrillation, pulseless ventricular tachycardia, pulseless electrical activity, asystole, and bradycardia with poor perfusion                                                                            |
| Time of arrest, day vs night                                                                                                                                                                                                                        |
| Event location, categorized as pediatric intensive care unit, emergency department, neonatal intensive care unit, cardiac intensive care unit, other intensive care unit, operating room or procedural area, newborn area, and other inpatient area |

**eTable 2.** Patient-Level Analysis: Characteristics of Events Without Return of Circulation Stratified by Quartile of CPR Duration

|                                                 | Total<br>n=3859 | Event Duration (minutes)             |                                       |                                        |                                        | P-value |
|-------------------------------------------------|-----------------|--------------------------------------|---------------------------------------|----------------------------------------|----------------------------------------|---------|
|                                                 |                 | Quartile 1<br>(0 to 15 min)<br>n=897 | Quartile 2<br>(16 to 27 min)<br>n=963 | Quartile 3<br>(28 to 45 min)<br>n=1022 | Quartile 4<br>(46 to 300 min)<br>n=977 |         |
| <b>Demographics and Patient Characteristics</b> |                 |                                      |                                       |                                        |                                        |         |
| <b>Event Year</b>                               |                 |                                      |                                       |                                        |                                        | .66     |
| 2000                                            | 48              | 6/48 (13%)                           | 10/48 (21%)                           | 15/48 (31%)                            | 17/48 (35%)                            |         |
| 2001                                            | 60              | 10/60 (17%)                          | 11/60 (18%)                           | 19/60 (32%)                            | 20/60 (33%)                            |         |
| 2002                                            | 103             | 18/103 (17%)                         | 26/103 (25%)                          | 33/103 (30%)                           | 26/103 (25%)                           |         |
| 2003                                            | 113             | 24/113 (21%)                         | 31/113 (27%)                          | 27/113 (24%)                           | 31/113 (27%)                           |         |
| 2004                                            | 149             | 30/149 (20%)                         | 33/149 (22%)                          | 39/149 (26%)                           | 47/149 (32%)                           |         |
| 2005                                            | 225             | 58/225 (26%)                         | 57/225 (25%)                          | 52/225 (23%)                           | 58/225 (26%)                           |         |
| 2006                                            | 203             | 50/203 (25%)                         | 62/203 (31%)                          | 50/203 (25%)                           | 41/203 (20%)                           |         |
| 2007                                            | 210             | 60/210 (29%)                         | 52/210 (25%)                          | 42/210 (20%)                           | 56/210 (27%)                           |         |
| 2008                                            | 215             | 43/215 (20%)                         | 67/215 (31%)                          | 51/215 (24%)                           | 54/215 (25%)                           |         |
| 2009                                            | 228             | 48/228 (21%)                         | 64/228 (28%)                          | 59/228 (26%)                           | 57/228 (25%)                           |         |
| 2010                                            | 192             | 50/192 (26%)                         | 46/192 (24%)                          | 52/192 (27%)                           | 44/192 (23%)                           |         |
| 2011                                            | 170             | 43/170 (25%)                         | 43/170 (25%)                          | 44/170 (26%)                           | 40/170 (24%)                           |         |
| 2012                                            | 238             | 58/238 (22%)                         | 57/238 (24%)                          | 60/238 (25%)                           | 63/238 (26%)                           |         |
| 2013                                            | 194             | 55/194 (28%)                         | 46/194 (24%)                          | 53/194 (27%)                           | 40/194 (21%)                           |         |
| 2014                                            | 188             | 35/188 (19%)                         | 43/188 (23%)                          | 52/188 (28%)                           | 58/188 (31%)                           |         |
| 2015                                            | 190             | 52/190 (27%)                         | 59/190 (31%)                          | 45/190 (24%)                           | 34/190 (18%)                           |         |
| 2016                                            | 190             | 37/190 (19%)                         | 45/190 (24%)                          | 63/190 (33%)                           | 45/190 (24%)                           |         |
| 2017                                            | 268             | 63/268 (24%)                         | 61/268 (23%)                          | 76/268 (28%)                           | 68/268 (25%)                           |         |
| 2018                                            | 220             | 58/220 (26%)                         | 51/220 (23%)                          | 55/220 (25%)                           | 56/220 (25%)                           |         |
| 2019                                            | 227             | 45/227 (20%)                         | 54/227 (24%)                          | 65/227 (29%)                           | 63/227 (28%)                           |         |
| 2020                                            | 203             | 47/203 (23%)                         | 39/203 (19%)                          | 63/203 (31%)                           | 54/203 (27%)                           |         |
| 2021                                            | 25              | 7/25 (28%)                           | 6/25 (24%)                            | 7/25 (28%)                             | 5/25 (20%)                             |         |
| <b>Age Groups</b>                               |                 |                                      |                                       |                                        |                                        | .002    |
| Neonates (0-30 days)                            | 1315            | 370/1315 (28%)                       | 345/1315 (26%)                        | 324 (25%)                              | 276 (21%)                              |         |
| Infants (31 days-1 year)                        | 927             | 169/927 (18%)                        | 214/927 (23%)                         | 281/927 (30%)                          | 263/927 (28%)                          |         |
| Young children (1-8 years)                      | 746             | 135/746 (18%)                        | 190/746 (25%)                         | 212/746 (28%)                          | 209/746 (28%)                          |         |
| Older children (>8 years)                       | 871             | 223/871 (26%)                        | 214/871 (25%)                         | 205/871 (24%)                          | 229/871 (26%)                          |         |
| <b>Sex</b>                                      |                 |                                      |                                       |                                        |                                        | .91     |
| Female                                          | 1684            | 387/1684 (23%)                       | 422/1684 (25%)                        | 452/1684 (27%)                         | 423/1684 (25%)                         |         |
| Male                                            | 2175            | 510/2175 (23%)                       | 541/2175 (25%)                        | 570/2175 (26%)                         | 554/2175 (25%)                         |         |
| <b>Race</b>                                     |                 |                                      |                                       |                                        |                                        | 0.002   |
| Asian                                           | 106             | 23/106 (22%)                         | 14/106 (13%)                          | 37/106 (35%)                           | 32/106 (30%)                           |         |
| Black                                           | 1070            | 252/1070 (24%)                       | 263/1070 (25%)                        | 282/1070 (26%)                         | 273/1070 (26%)                         |         |
| Other/Unknown                                   | 795             | 207/795 (26%)                        | 219/795 (28%)                         | 198/795 (25%)                          | 171/795 (22%)                          |         |
| White                                           | 1888            | 415/1888 (22%)                       | 467/1888 (25%)                        | 505/1888 (27%)                         | 501/1888 (27%)                         |         |
| <b>Ethnicity</b>                                |                 |                                      |                                       |                                        |                                        | 0.08    |
| Hispanic                                        | 705             | 171/705 (24%)                        | 196/705 (28%)                         | 172/705 (24%)                          | 166/705 (24%)                          |         |
| <b>Illness Category</b>                         |                 |                                      |                                       |                                        |                                        | <0.001  |
| Medical Cardiac                                 | 601             | 113/601 (19%)                        | 154/601 (26%)                         | 171/601 (28%)                          | 163/601 (27%)                          |         |
| Medical Noncardiac                              | 1750            | 392/1750 (22%)                       | 431/1750 (25%)                        | 475/1750 (27%)                         | 452/1750 (26%)                         |         |
| Surgical Cardiac                                | 322             | 45/322 (14%)                         | 73/322 (23%)                          | 99/322 (31%)                           | 105/322 (33%)                          |         |
| Surgical Noncardiac                             | 228             | 45/228 (20%)                         | 44/228 (19%)                          | 69/228 (30%)                           | 70/228 (31%)                           |         |
| Newborn                                         | 584             | 171/584 (29%)                        | 156/584 (27%)                         | 136/584 (23%)                          | 121/584 (21%)                          |         |
| Trauma                                          | 374             | 131/374 (35%)                        | 105/374 (28%)                         | 72/374 (19%)                           | 66/374 (18%)                           |         |
| <b>Pre-Existing Conditions</b>                  |                 |                                      |                                       |                                        |                                        | .02     |
| Acyanotic Cardiac Malformation <sup>a</sup>     | 262             | 39/262 (15%)                         | 69/262 (26%)                          | 90/262 (34%)                           | 64/262 (24%)                           |         |
| Cyanotic Cardiac Malformation <sup>a</sup>      | 374             | 65/374 (17%)                         | 77/374 (21%)                          | 120/374 (21%)                          | 112/374 (30%)                          | <.001   |

|                                                                      |      |                |                |                |                |       |
|----------------------------------------------------------------------|------|----------------|----------------|----------------|----------------|-------|
| Noncardiac Congenital Malformation <sup>a</sup>                      | 457  | 94/457 (21%)   | 111/457 (24%)  | 139/457 (30%)  | 113/457 (25%)  | .17   |
| Hypotension/hypoperfusion                                            | 1392 | 394/1392 (28%) | 355/1392 (26%) | 336/1392 (24%) | 307/1392 (22%) | <.001 |
| Respiratory insufficiency                                            | 2426 | 594/2426 (24%) | 591/2426 (24%) | 631/2426 (26%) | 610/2426 (25%) | .13   |
| Renal insufficiency                                                  | 453  | 137/453 (30%)  | 116/453 (26%)  | 100/453 (22%)  | 100/453 (22%)  | <.001 |
| Sepsis <sup>b</sup>                                                  | 727  | 176/727 (24%)  | 172/727 (24%)  | 187/727 (26%)  | 192/727 (26%)  | .96   |
| Metastatic/hematologic malignancy                                    | 236  | 77/236 (%)     | 52/236 (22%)   | 47/236 (20%)   | 60/236 (25%)   | .02   |
| <b>Admission Pediatric Cerebral Performance Category<sup>c</sup></b> |      |                |                |                |                | <.001 |
| 1                                                                    | 948  | 169/948 (18%)  | 202/948 (21%)  | 255/948 (27%)  | 322/948 (34%)  |       |
| 2                                                                    | 315  | 50/315 (16%)   | 69/315 (22%)   | 106/315 (34%)  | 90/315 (29%)   |       |
| 3                                                                    | 248  | 62/248 (25%)   | 58/248 (23%)   | 67/248 (27%)   | 61/248 (25%)   |       |
| 4+                                                                   | 704  | 204/704 (29%)  | 182/704 (26%)  | 170/704 (24%)  | 148/704 (21%)  |       |
| <b>Event Characteristics</b>                                         |      |                |                |                |                |       |
| <b>Pre-Event Interventions in Place</b>                              |      |                |                |                |                |       |
| Mechanical ventilation                                               | 2843 | 767/2843 (27%) | 728/2843 (26%) | 688/2843 (24%) | 660/2843 (23%) | <.001 |
| Invasive airway                                                      | 1869 | 507/1869 (27%) | 508/1869 (27%) | 431/1869 (23%) | 423/1869 (23%) | <.001 |
| Vasoactive agent                                                     | 1578 | 471/1578 (30%) | 409/1578 (26%) | 350/1578 (22%) | 348/1578 (22%) | <.001 |
| <b>Event Location</b>                                                |      |                |                |                |                | 0.20  |
| ICU                                                                  | 2809 | 713/2809 (25%) | 670/2809 (24%) | 724/2809 (26%) | 702/2809 (25%) |       |
| Monitored                                                            | 62   | 5/62 (8%)      | 11/62 (18%)    | 22/62 (35%)    | 24/62 (39%)    |       |
| Non-Monitored                                                        | 150  | 12/150 (8%)    | 40/150 (27%)   | 45/150 (30%)   | 53/150 (35%)   |       |
| Emergency Department                                                 | 587  | 111/587 (19%)  | 164/587 (28%)  | 174/587 (30%)  | 138/587 (24%)  |       |
| Procedural                                                           | 163  | 31/163 (19%)   | 43/163 (26%)   | 42/163 (26%)   | 47/163 (29%)   |       |
| Other                                                                | 88   | 25/88 (28%)    | 35/88 (40%)    | 15/88 (17%)    | 13/88 (15%)    |       |
| <b>Initial Rhythm</b>                                                |      |                |                |                |                | .001  |
| Asystole                                                             | 963  | 232/963 (24%)  | 282/963 (29%)  | 279/963 (29%)  | 170/963 (18%)  |       |
| Bradycardia                                                          | 1711 | 393/1711 (23%) | 398/1711 (23%) | 464/1711 (27%) | 456/1711 (27%) |       |
| PEA                                                                  | 984  | 225/984 (23%)  | 230/984 (23%)  | 238/984 (24%)  | 291/984 (30%)  |       |
| VF                                                                   | 94   | 23/94 (24%)    | 26/94 (28%)    | 23/94 (24%)    | 22/94 (23%)    |       |
| Pulseless VT                                                         | 107  | 24/107 (22%)   | 27/107 (25%)   | 18/107 (17%)   | 38/107 (36%)   |       |

<sup>a</sup>928 missing; <sup>b</sup>220 missing; <sup>c</sup>1644 missing; The race Other/Unknown category includes self-reported registry data from the following groupings: American Indian or Alaska Native, Native Hawaiian or Other Pacific Islander, other, and unknown; CPR: cardiopulmonary resuscitation; ICU: intensive care unit; PEA: pulseless electrical activity; VF: ventricular fibrillation; VT: ventricular tachycardia

**eTable 3. Patient Characteristics: All Eligible Events by Resuscitation Status**

|                                                 | Total (n=13,899) | ROC (n=10,040)   | No ROC (n=3,859) | P-value |
|-------------------------------------------------|------------------|------------------|------------------|---------|
| <b>Demographics and Patient Characteristics</b> | No               | No/Total No (%)  | No/Total No (%)  |         |
| <b>Event Year</b>                               |                  |                  |                  | <.001   |
| 2000                                            | 104              | 56/104 (54%)     | 48/104 (46%)     |         |
| 2001                                            | 162              | 102/162 (63%)    | 60/162 (37%)     |         |
| 2002                                            | 246              | 143/246 (58%)    | 103/246 (42%)    |         |
| 2003                                            | 285              | 172/285 (60%)    | 113/285 (40%)    |         |
| 2004                                            | 399              | 250/399 (63%)    | 149/399 (37%)    |         |
| 2005                                            | 720              | 495/720 (69%)    | 225/720 (31%)    |         |
| 2006                                            | 654              | 451/654 (69%)    | 203/654 (31%)    |         |
| 2007                                            | 680              | 470/680 (69%)    | 210/680 (31%)    |         |
| 2008                                            | 760              | 545/760 (72%)    | 215/760 (28%)    |         |
| 2009                                            | 799              | 571/799 (72%)    | 228/799 (29%)    |         |
| 2010                                            | 715              | 523/715 (73%)    | 192/715 (27%)    |         |
| 2011                                            | 675              | 505/675 (75%)    | 170/675 (25%)    |         |
| 2012                                            | 813              | 575/813 (71%)    | 238/813 (29%)    |         |
| 2013                                            | 776              | 582/776 (75%)    | 194/776 (25%)    |         |
| 2014                                            | 736              | 548/736 (75%)    | 188/736 (26%)    |         |
| 2015                                            | 784              | 594/784 (76%)    | 190/784 (24%)    |         |
| 2016                                            | 822              | 632/822 (77%)    | 190/822 (23%)    |         |
| 2017                                            | 972              | 704/972 (72%)    | 268/972 (28%)    |         |
| 2018                                            | 979              | 759/979 (78%)    | 220/979 (23%)    |         |
| 2019                                            | 937              | 710/937 (76%)    | 227/937 (24%)    |         |
| 2020                                            | 770              | 567/770 (74%)    | 203/770 (26%)    |         |
| 2021                                            | 111              | 86/111 (78%)     | 25/111 (23%)     |         |
| <b>Age Groups</b>                               |                  |                  |                  | <.001   |
| Neonates (0-30 days)                            | 4513             | 3198/4513 (71%)  | 1315 (29%)       |         |
| Infants (31 days-1 year)                        | 4594             | 3667/4594 (80%)  | 927/4594 (20%)   |         |
| Young children (1-8 years)                      | 2406             | 1660/2406 (69%)  | 746/2406 (31%)   |         |
| Older children (>8 years)                       | 2386             | 1515/2386 (63%)  | 871/2386 (37%)   |         |
| <b>Race</b>                                     |                  |                  |                  | 0.015   |
| Asian                                           | 411              | 305/411 (74%)    | 106/411 (26%)    |         |
| Black                                           | 3633             | 2563/3633 (71%)  | 1070/3633 (29%)  |         |
| Other/Unknown                                   | 2741             | 1946/2741 (71%)  | 795/2741 (29%)   |         |
| White                                           | 7114             | 5226/7114 (73%)  | 1888/7114 (27%)  |         |
| <b>Illness Category<sup>a</sup></b>             |                  |                  |                  | <.001   |
| Medical Cardiac                                 | 2100             | 1499/2100 (71%)  | 601/2100 (29%)   |         |
| Medical Noncardiac                              | 5816             | 4066/5816 (70%)  | 1750/5816 (30%)  |         |
| Surgical Cardiac                                | 2013             | 1691/2013 (84%)  | 322/2013 (16%)   |         |
| Surgical Noncardiac                             | 1183             | 955/1183 (81%)   | 228/1183 (19%)   |         |
| Newborn                                         | 1927             | 1343/1927 (70%)  | 584/1927 (30%)   |         |
| Trauma                                          | 853              | 479/853 (56%)    | 374/853 (44%)    |         |
| <b>Pre-Existing Conditions</b>                  |                  |                  |                  |         |
| Hypotension/hypoperfusion                       | 4097             | 2705/4097 (66%)  | 1392/4097 (34%)  | <.001   |
| Respiratory insufficiency                       | 9101             | 6675/9101 (73%)  | 2426/9101 (27%)  | <.001   |
| Renal insufficiency                             | 1330             | 877/1330 (66%)   | 453/1330 (34%)   | <.001   |
| Sepsis                                          | 1986             | 1259/1986 (63%)  | 727/1986 (37%)   | <.001   |
| Metastatic/hematologic malignancy               | 534              | 298/534 (56%)    | 236/534 (44%)    | <.001   |
| <b>Event Characteristics</b>                    |                  |                  |                  |         |
| <b>Pre-Arrest Interventions</b>                 |                  |                  |                  |         |
| Assisted/mechanical ventilation                 | 10306            | 7377/10306 (72%) | 2929/10306 (28%) | .003    |
| Invasive airway                                 | 6187             | 4318/6187 (70%)  | 1869/6187 (30%)  | <.001   |
| Vasoactive agent                                | 4481             | 2903/4481 (65%)  | 1578/4481 (35%)  | <.001   |
| <b>Initial Rhythm</b>                           |                  |                  |                  | <.001   |
| Asystole                                        | 2276             | 1313/2276 (58%)  | 963/2276 (42%)   |         |
| Bradycardia with poor perfusion                 | 7820             | 6109/7820 (78%)  | 1711/7820 (22%)  |         |

|              |      |                 |                |
|--------------|------|-----------------|----------------|
| PEA          | 3014 | 2030/3014 (67%) | 984/3014 (33%) |
| VF           | 397  | 303/397 (76%)   | 94/397 (24%)   |
| Pulseless VT | 392  | 285/392 (73%)   | 107/392 (27%)  |

<sup>a</sup>7 missing; The race Other/Unknown category includes self-reported registry data from the following groupings: American Indian or Alaska Native, Native Hawaiian or Other Pacific Islander, other, and unknown; Sex, Hispanic ethnicity, and event location were not significantly associated with CPR duration and thus, have been removed from this table. ROC: return of circulation; ICU: intensive care unit; PEA: pulseless electrical activity; VF: ventricular fibrillation; VT: ventricular tachycardia

**eFigure 1.** Distribution of CPR Duration in All Events

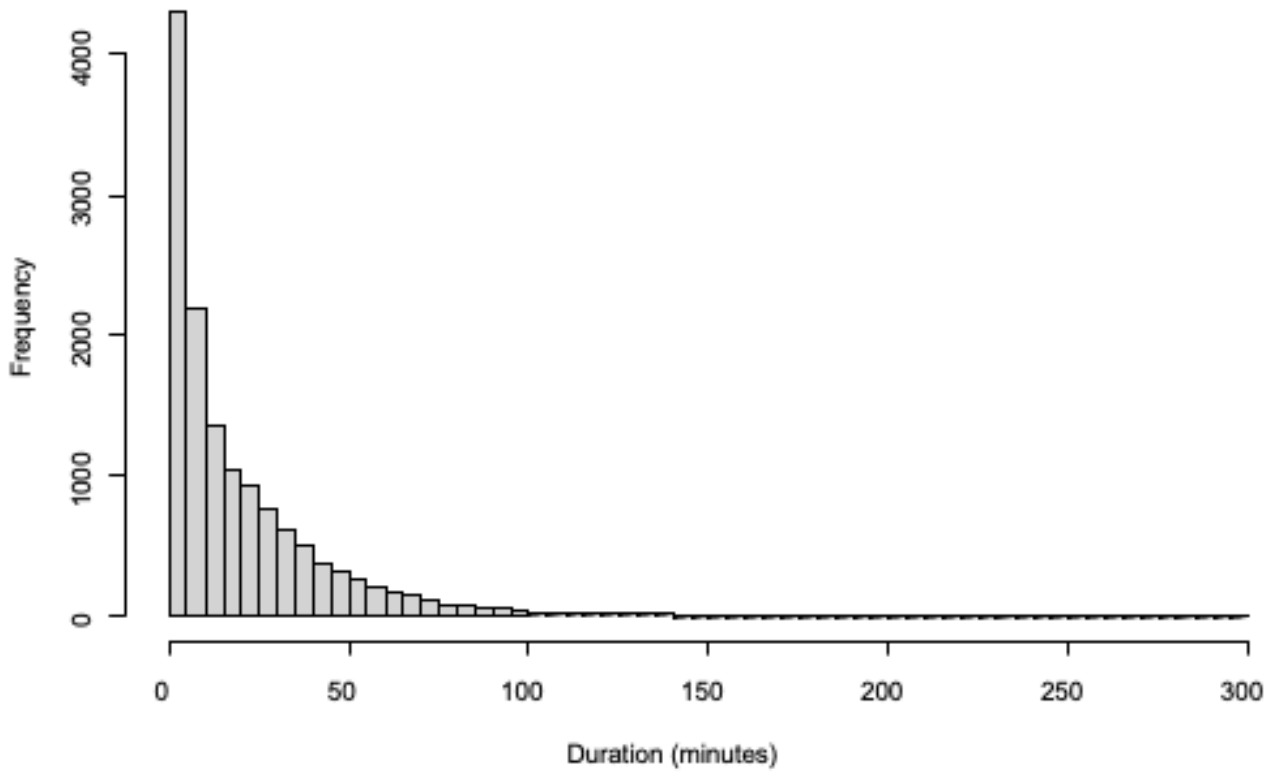

**eFigure 2.** Distribution of CPR Duration in Events With Return of Circulation

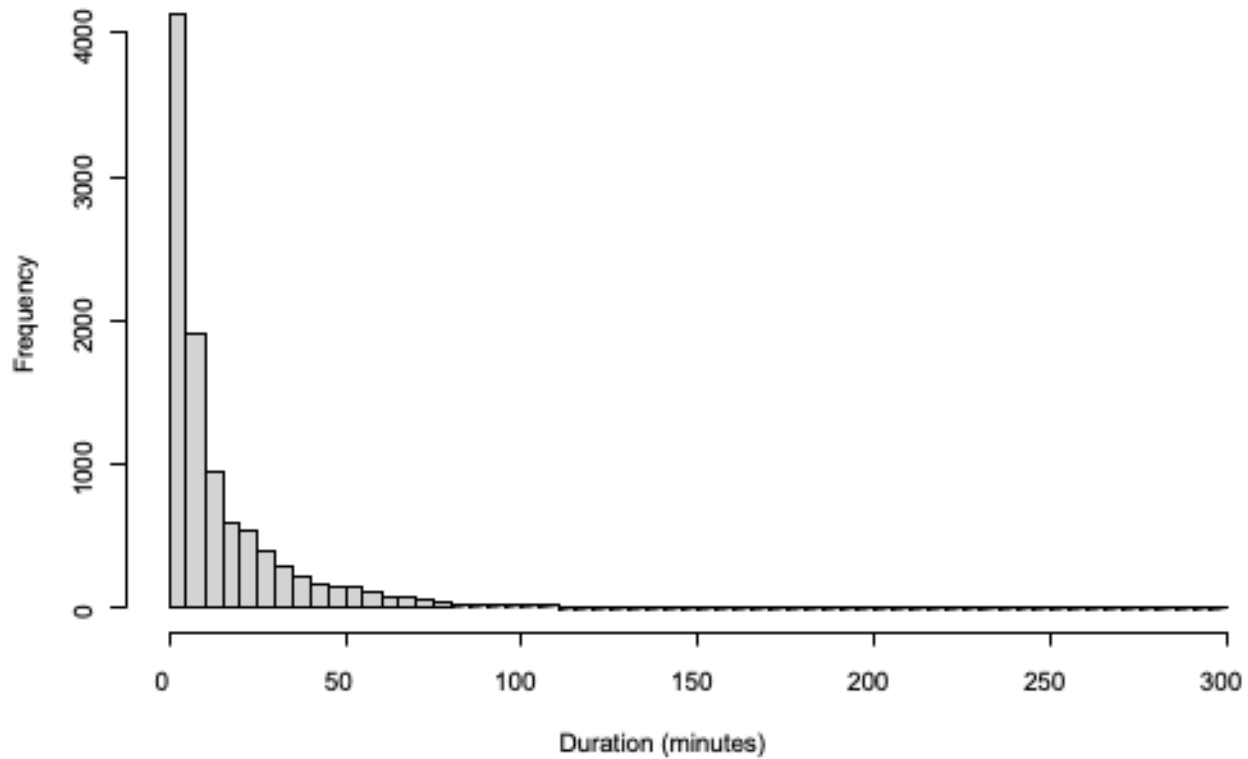

**eTable 4.** Multivariable Model of Patient-Level Analysis: Factors Associated With CPR Duration Among Events Without Return of Circulation

| <b>Factor</b>                                        | <b>Beta Weight predicting duration (minutes, 95% CI)</b> | <b>P-value</b> |
|------------------------------------------------------|----------------------------------------------------------|----------------|
| Year +1                                              | -0.14 (-0.37, 0.08)                                      | .21            |
| <b>Age (reference: older children)</b>               |                                                          |                |
| Neonate                                              | -4.86 (-8.88, -0.84)                                     | .02            |
| Infant                                               | 0.26 (-2.78, 3.29)                                       | .87            |
| Young children                                       | 0.02 (-2.97, 3.02)                                       | .99            |
| <b>Sex: Male vs female</b>                           | 1.19 (-0.72, 3.1)                                        | .22            |
| <b>Race (reference: white)</b>                       |                                                          |                |
| Black                                                | 0.65 (-1.61, 2.9)                                        | .57            |
| Asian                                                | 3.56 (-2.29, 9.42)                                       | .23            |
| Other/unknown                                        | -3.67 (-6.18, -1.17)                                     | .004           |
| <b>Initial Rhythm (reference: asystole)</b>          |                                                          |                |
| Bradycardia with poor perfusion                      | 8.37 (5.7, 11.03)                                        | <.0001         |
| PEA                                                  | 8.22 (5.44, 11)                                          | <.0001         |
| VF                                                   | -0.17 (-6.56, 6.22)                                      | .96            |
| Pulseless VT                                         | 6.17 (0.09, 12.26)                                       | .05            |
| <b>Event Location (reference: PICU)</b>              |                                                          |                |
| ED                                                   | -4.02 (-7.48, -0.57)                                     | .02            |
| NICU                                                 | -3.74 (-7.74, 0.25)                                      | .07            |
| Pediatric CICU                                       | 2.97 (-1.86, 7.79)                                       | .23            |
| Other ICU                                            | -0.24 (-3.87, 3.39)                                      | .90            |
| Operative/Procedural Area                            | 3.15 (-2.08, 8.37)                                       | .24            |
| Newborn Area                                         | -6.86 (-14.21, 0.49)                                     | .07            |
| Other inpatient area                                 | 1.06 (-4.1, 6.22)                                        | .69            |
| <b>Illness Category (reference: medical cardiac)</b> |                                                          |                |
| Medical non-cardiac                                  | 0.74 (-2.25, 3.72)                                       | .63            |
| Surgical cardiac                                     | 4.02 (-0.3, 8.35)                                        | .07            |
| Surgical non-cardiac                                 | 8.33 (3.47, 13.19)                                       | <.001          |
| Newborn                                              | 1.63 (-2.51, 5.78)                                       | .44            |
| Trauma                                               | -4.8 (-11.53, 1.92)                                      | .16            |
| <b>Pre-Existing Conditions</b>                       |                                                          |                |
| Heart failure this admission                         | 4.51 (-0.1, 9.12)                                        | .06            |
| Heart failure prior to this admission                | -4.64 (-9.7, 0.41)                                       | .07            |
| Hypotension                                          | -0.83 (-3.03, 1.38)                                      | .46            |
| Renal insufficiency                                  | -4.38 (-7.57, -1.2)                                      | .007           |
| Hepatic insufficiency                                | -1.78 (-6.13, 2.57)                                      | .42            |
| Metabolic abnormality                                | -1.81 (-4.33, 0.71)                                      | .16            |
| Pneumonia                                            | 3.59 (-0.32, 7.5)                                        | .07            |
| Major trauma                                         | -2.42 (-8.49, 3.64)                                      | .43            |
| <b>Pre-Event Interventions in Place</b>              |                                                          |                |
| Mechanical ventilation                               | -7.6 (-10.34, -4.86)                                     | <.0001         |
| Vasoactive agent                                     | -1.74 (-3.97, 0.49)                                      | .13            |
| Hospital-wide response activation                    | 2.16 (-0.29, 4.62)                                       | .08            |
| AED applied                                          | 4.43 (1.39, 7.48)                                        | .004           |

PEA: pulseless electrical activity; VF: ventricular fibrillation; VT: ventricular tachycardia; ED: emergency department; NICU: neonatal intensive care unit; CICU: cardiac intensive care unit; ICU: intensive care unit; AED: automated external defibrillator



**eFigure 3.** Unabbreviated Forest Plot of Patient-Level Analysis Multivariable Model: Patient and Event Factors Associated With CPR Duration in Events Without Return of Circulation

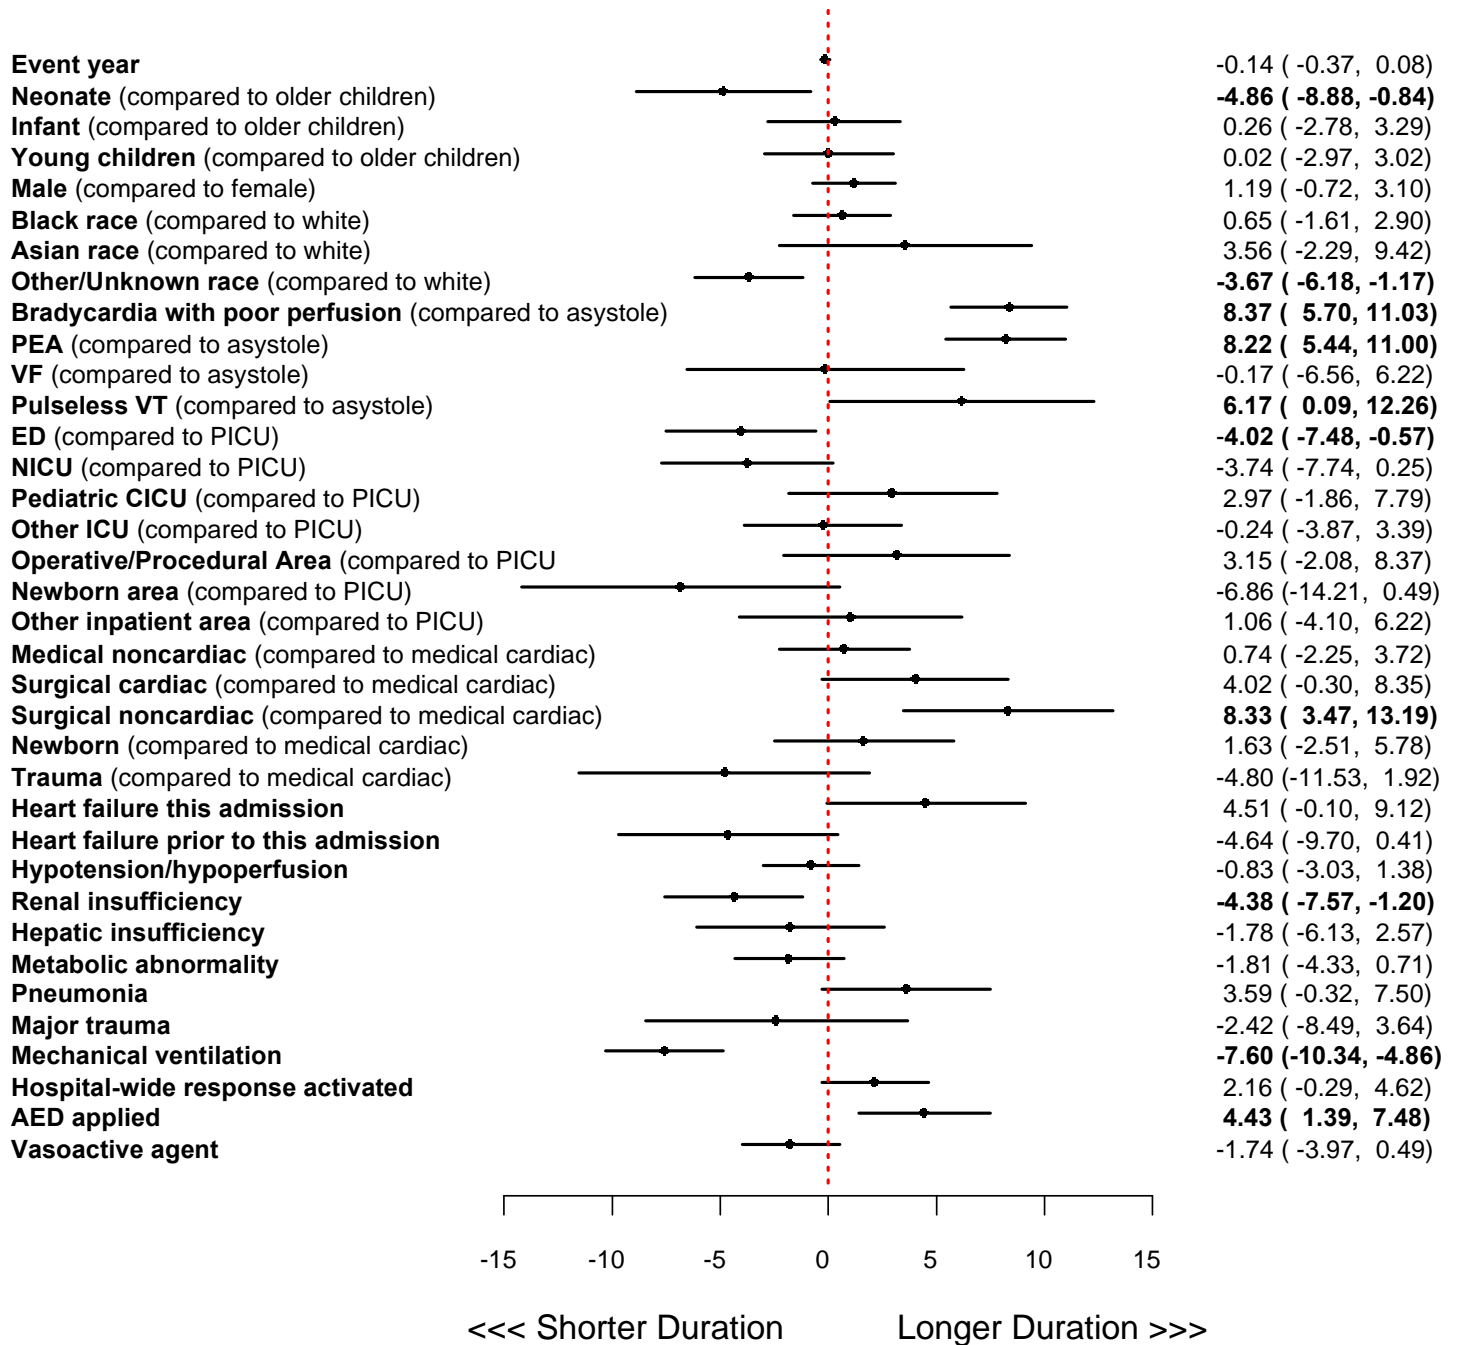

Patient and event factors are listed on the left. CPR duration in minutes (95% CI) is listed on the right.

PEA: pulseless electrical activity; VF: ventricular fibrillation; VT: ventricular tachycardia; ED: Emergency Department; NICU: Neonatal intensive care unit; CICU: Cardiac intensive care unit; ICU: intensive care unit; AED: automated external defibrillator

**eTable 5.** Hospital-Level Analysis: Site Characteristics by Hospital Quartile of Median CPR Duration in Events Without Return of Circulation

| Hospital Characteristic                   | All Sites<br>n=81 | Quartile of Median Event Duration      |                                        |                                          |                                      | P-value |
|-------------------------------------------|-------------------|----------------------------------------|----------------------------------------|------------------------------------------|--------------------------------------|---------|
|                                           |                   | Quartile 1<br>(15 to 25.9 min)<br>n=20 | Quartile 2<br>(26 to 29.4 min)<br>n=20 | Quartile 3<br>(29.5 to 32.9 min)<br>n=19 | Quartile 4<br>(22 to 53 min)<br>n=22 |         |
| <b>Teaching Status<sup>a</sup></b>        |                   |                                        |                                        |                                          |                                      | .24     |
| None                                      | 3                 | 0/3 (0%)                               | 1/3 (33%)                              | 2/3 (67%)                                | 0/3 (0%)                             |         |
| Minor                                     | 40                | 12/40 (30%)                            | 7/40 (18%)                             | 11/40 (28%)                              | 10/40 (25%)                          |         |
| Major                                     | 33                | 7/33 (21%)                             | 11/33 (33%)                            | 5/33 (15%)                               | 10/33 (30%)                          |         |
| Missing                                   | 5                 | 1                                      | 1                                      | 1                                        | 2                                    |         |
| <b>Hospital Size (beds)<sup>a</sup></b>   |                   |                                        |                                        |                                          |                                      | .07     |
| <200                                      | 4                 | 0/4 (0%)                               | 3/4 (75%)                              | 1/4 (25%)                                | 0/4 (0%)                             |         |
| 200-499                                   | 30                | 7/30 (23%)                             | 10/30 (33%)                            | 4/30 (13%)                               | 9/30 (30%)                           |         |
| 500+                                      | 42                | 12/42 (29%)                            | 6/42 (14%)                             | 13/42 (31%)                              | 11/42 (26%)                          |         |
| Missing                                   | 5                 | 1                                      | 1                                      | 1                                        | 2                                    |         |
| <b>Census Division Region<sup>a</sup></b> |                   |                                        |                                        |                                          |                                      | .78     |
| North MidAtlantic                         | 13                | 3/13 (23%)                             | 2/13 (15%)                             | 4/13 (31%)                               | 4/13 (31%)                           |         |
| South Atlantic                            | 22                | 8/22 (36%)                             | 4/22 (18%)                             | 6/22 (27%)                               | 4/22 (18%)                           |         |
| North Central                             | 14                | 2/14 (14%)                             | 4/14 (29%)                             | 4/14 (29%)                               | 4/14 (29%)                           |         |
| South Central                             | 15                | 5/15 (33%)                             | 4/15 (27%)                             | 2/15 (13%)                               | 4/15 (27%)                           |         |
| Mountain/Pacific                          | 12                | 1/12 (8.3%)                            | 5/12 (42%)                             | 2/12 (17%)                               | 4/12 (33%)                           |         |
| Missing                                   | 5                 | 1                                      | 1                                      | 1                                        | 2                                    |         |

<sup>a</sup>5 missing

CPR: cardiopulmonary resuscitation; min: minutes
