# Supplementary material for: Characteristics of Pediatric In-Hospital Cardiac Arrests and Resuscitation Duration
Source: PubMed Central journal article supplement (PMC11289702; doi:10.1001/jamanetworkopen.2024.24670), 2024-07-30
Supplement: jamanetwopen-e2424670-s002.pdf [file jamanetwopen-e2424670-s002.pdf]

\*First name, last name, and suffix (if applicable) are required and will appear in PubMed.

| <b>*Group Name(s): the American Heart Association's Get With the Guidelines–Resuscitation Investigators</b> |                   |                              |                           |                                                                                                                                                                                                           |                                                 |                                                                |                                                                                                   |
|-------------------------------------------------------------------------------------------------------------|-------------------|------------------------------|---------------------------|-----------------------------------------------------------------------------------------------------------------------------------------------------------------------------------------------------------|-------------------------------------------------|----------------------------------------------------------------|---------------------------------------------------------------------------------------------------|
| <b>*First Name and Middle Initial(s)</b>                                                                    | <b>*Last Name</b> | <b>*Suffix (eg, Jr, III)</b> | <b>Academic Degrees</b>   | <b>Institution</b>                                                                                                                                                                                        | <b>Location (city, state/province, country)</b> | <b>Role or Contribution, eg, chair, principal investigator</b> | <b>Group (if more than 1 Group listed in the byline) and/or Subgroup (eg, Steering Committee)</b> |
| Anne-Marie                                                                                                  | Guerguerian       |                              | MD PhD FRCPC<br>FAAP FAHA | Department of Critical Care Medicine, SickKids Research Institute, The Hospital for Sick Children, University of Toronto                                                                                  | Toronto, Ontario, Canada                        |                                                                |                                                                                                   |
| Caitlin E.                                                                                                  | O'Brien           |                              | MD MPH                    | Johns Hopkins University School of Medicine, Department of Anesthesiology and Critical Care Medicine                                                                                                      | Baltimore, Maryland, USA                        |                                                                |                                                                                                   |
| Ericka L.                                                                                                   | Fink              |                              | MD MS                     | Children's Hospital of Pittsburgh of UPMC, Department of Critical Care Medicine                                                                                                                           | Pittsburgh, Pennsylvania, USA                   |                                                                |                                                                                                   |
| Javier J.                                                                                                   | Lasa              |                              | MD FAAP                   | Children's Medical Center, UT Southwestern Medical Center                                                                                                                                                 | Dallas, Texas, USA                              |                                                                |                                                                                                   |
| Joan S.                                                                                                     | Roberts           |                              | MD                        | Seattle Children's Hospital, University of Washington                                                                                                                                                     | Seattle, Washington, USA                        |                                                                |                                                                                                   |
| Lililan                                                                                                     | Su                |                              | MD                        | Division of Cardiac Intensive Care, Department of Pediatrics, Phoenix Children's Hospital                                                                                                                 | Phoenix, Arizona, USA                           |                                                                |                                                                                                   |
| Linda L.                                                                                                    | Brown             |                              | MD MSCE                   | The Warren Alpert Medical School of Brown University                                                                                                                                                      | Providence, Rhode Island, USA                   |                                                                |                                                                                                   |
| Maya                                                                                                        | Dewan             |                              | MD MPH                    | Cincinnati Children's Hospital Medical Center; Department of Pediatrics, College of Medicine, University of Cincinnati; Division of Biomedical Informatics, Cincinnati Children's Hospital Medical Center | Cincinnati, Ohio, USA                           |                                                                |                                                                                                   |
| Monica                                                                                                      | Kleinman          |                              | MD                        | Department of Anesthesiology, Critical Care and Pain Medicine, Boston Children's Hospital                                                                                                                 | Boston, Massachusetts, USA                      |                                                                |                                                                                                   |

## Supplemental Online Content: Nonauthor Collaborators

\*First name, last name, and suffix (if applicable) are required and will appear in PubMed.

| *First Name and Middle Initial(s) | *Last Name | *Suffix (eg, Jr, III) | Academic Degrees | Institution                                                                                         | Location (city, state/province, country) | Role or Contribution, eg, chair, principal investigator | Group (if more than 1 Group listed in the byline) and/or Subgroup (eg, Steering Committee) |
|-----------------------------------|------------|-----------------------|------------------|-----------------------------------------------------------------------------------------------------|------------------------------------------|---------------------------------------------------------|--------------------------------------------------------------------------------------------|
| Noorjahan                         | Ali        |                       | MD MS FAAP       | Division of Neonatal-Perinatal Medicine, Department of Pediatrics, University of Texas Southwestern | Dallas, Texas, USA                       |                                                         |                                                                                            |
| Punkaj                            | Gupta      |                       | MBBS             | Section of Cardiac Critical Care, Methodist Children's Hospital                                     | San Antonio, Texas, USA                  |                                                         |                                                                                            |
| Robert                            | Sutton     |                       | MD MSCE          | Department of Anesthesia and Critical Care, The Children's                                          | Philadelphia, Pennsylvania, USA          |                                                         |                                                                                            |
| Ron                               | Reeder     |                       | MS PhD           | University of Utah School of Medicine                                                               | Salt Lake City, Utah, USA                |                                                         |                                                                                            |
| Todd                              | Sweberg    |                       | MD MBA           | Department of Pediatric Critical Care, Cohen Children's Medical Center of New York                  | New Hyde Park, New York, USA             |                                                         |                                                                                            |
