# Supplementary material for: Characteristics of Pediatric In-Hospital Cardiac Arrests and Resuscitation Duration
Source: PubMed Central journal article supplement (PMC11289702; doi:10.1001/jamanetworkopen.2024.24670), 2024-07-30
Supplement: jamanetwopen-e2424670-s003.pdf [file jamanetwopen-e2424670-s003.pdf]

## Data Sharing Statement

O'Halloran. Characteristics of Pediatric In-Hospital Cardiac Arrests and Resuscitation Duration. *JAMA Netw Open*. Published July 30, 2024. doi:10.1001/jamanetworkopen.2024.24670

### Data

**Data available:** No

### Additional Information

**Explanation for why data not available:** The data that support the findings of this study are available from the American Heart Association's Get With The Guidelines Registry. The data, which are collected primarily for quality improvement purposes, are available through the American Heart Association's application process.
